# Supplementary material
Source: PubMed Central journal article supplement (PMC1993919)
Supplement: NIHMS21333-supplement-01.pdf [file NIHMS21333-supplement-01.pdf]

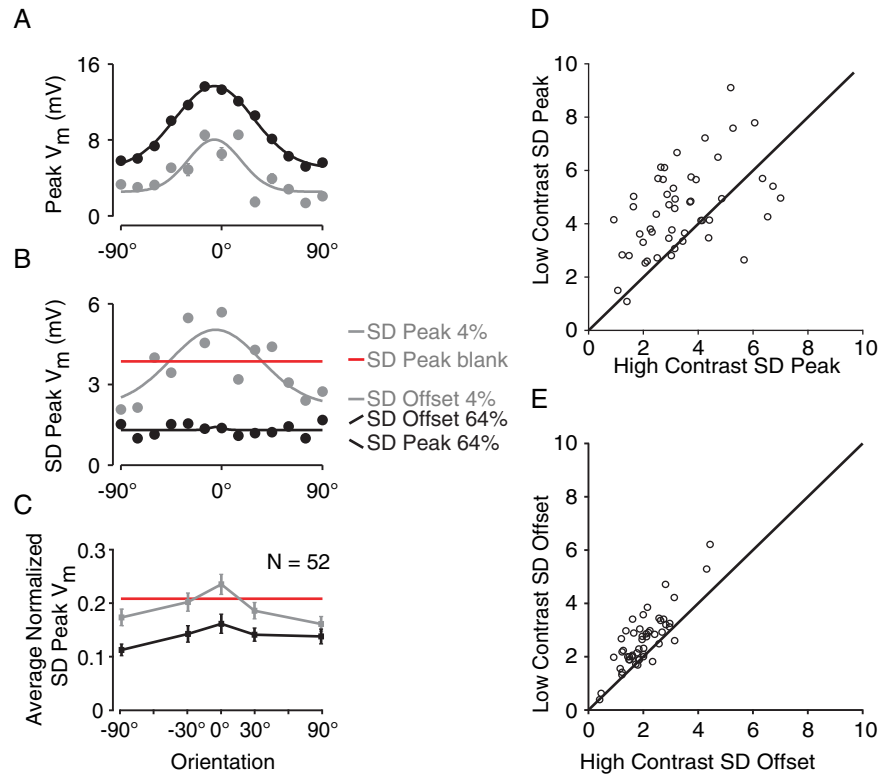

Supplementary Figure 1

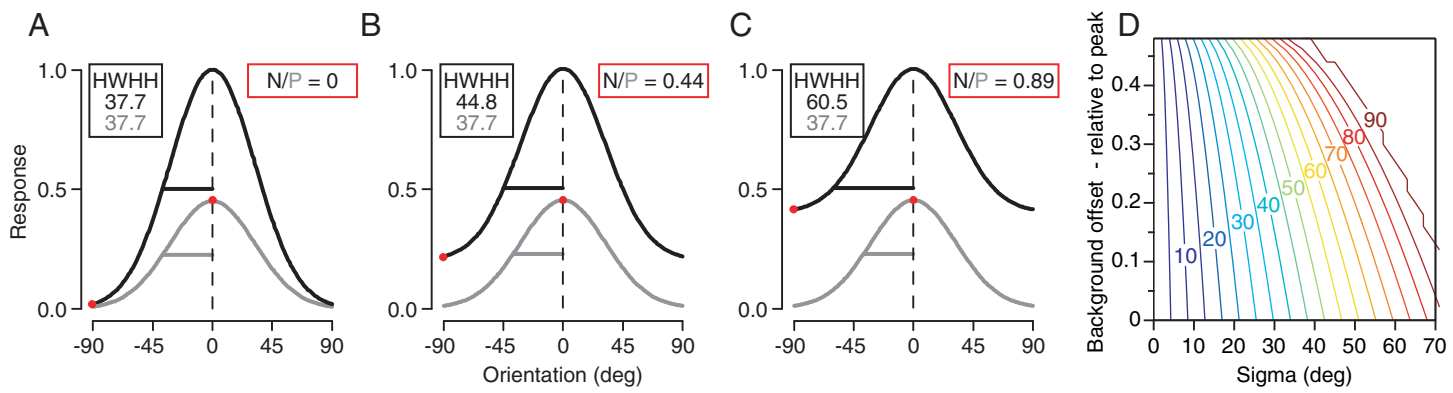

Supplementary Figure 2

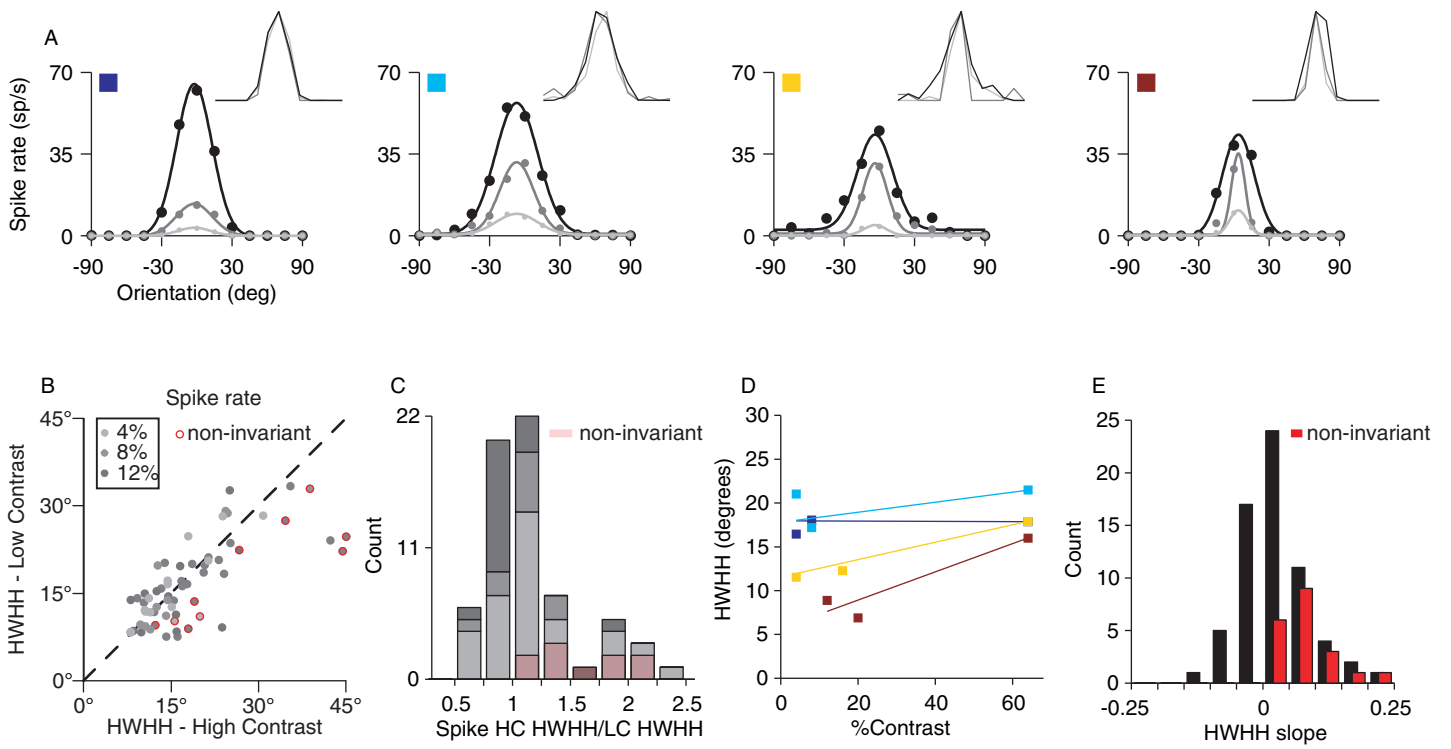

Supplementary Figure 3

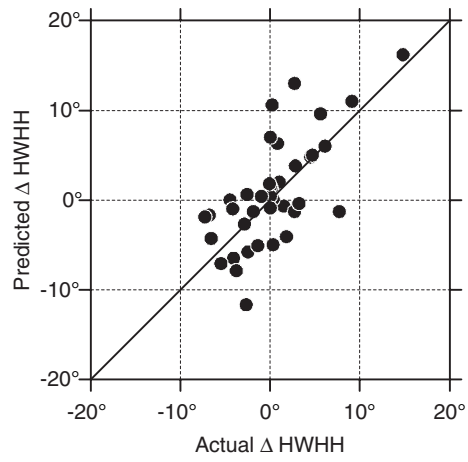

Supplementary Figure 4

**\* Response to Reviewers**

No response to reviewers.
